# Supplementary material
Source: publisher figshare collection journal article supplement (https://geolsoc.figshare.com/ndownloader/files/5425379)
Supplement: Supplementary file 1 [file 5425379]

Centimeters	Preservation	Abundance per gram of rock	Schizosphaerella spp.	Orthogonoides hamiltoniae	Crucirhabdus primulus	small Crucirhabdus primulus	Zeugrhabdotus erectus	Ethmorhabdus gallicus	Parhabdolithus liasicus	Mitrolithus jansae	Mitrolithus elegans	Mitrolithus lenticularis	Tubirhabdus patulus	Crepidolithus cavus	Crepidolithus granulatus	Crepidolithus crassus	Crepidolithus aff. C. crassus	Stradnerlithus clatriatus	Bucanthus decussatus	Diductius constans	Biscutum dubium	Biscutum novum	Biscutum finchii	Biscutum grande	Biscutum intermedium	Biscutum davyi	Similiscutum cruciulus	Similiscutum avitum	Similiscutum orbiculus	Similiscutum precarium	Sollasites lowei	Mazaganella pulla	Mazaganella protensa	Bussonius prinsii	Bussonius leufuensis	Lotharingius imprimus	Lotharingius hauffii	Lotharingius umbriensis	Lotharingius frodoi	Lotharingius barozii	Lotharingius sigillatus	Lotharingius crucicentralis	Lotharingius forensis	Lotharingius velatus	Calyculus spp.	Carinolithus poulnabronei	Carinolithus superbus	Discorhabdus ignotus	Discorhabdus striatus
1051.2	moderate	55016587.98	X	0	0	X	0	0	X	0	0	0	X	X	X	X	X	0	0	0	0	0	X	X	X	X	0	0	0	0	X	0	0	X	0	X	X	X	X	X	X	X	X	X	X	0	0	X	X
1043.5	moderate	150400926.6	X	0	X	0	0	0	X	0	0	0	X	X	X	X	0	0	0	0	X	X	X	0	0	0	0	0	0	0	0	0	0	X	0	0	X	X	X	X	X	X	0	X	0	0	0	X	X
1031.7	good	179400591	X	0	0	0	0	0	X	0	0	0	X	X	X	X	X	0	0	0	X	0	X	0	0	X	0	0	0	0	X	0	0	X	X	0	X	X	X	X	X	X	0	X	0	0	0	X	X
1015.5	moderate	168396403.4	X	0	X	0	0	0	X	0	0	X	X	X	X	X	X	0	0	0	0	0	X	X	0	0	0	0	0	0	0	0	0	X	0	0	X	X	X	X	X	X	0	X	X	0	X	X	X
1000.5	moderate	315539793.7	X	0	0	0	0	0	X	0	X	X	X	X	0	X	X	0	0	0	X	X	X	0	0	0	0	X	0	0	0	0	0	X	X	0	X	X	X	X	X	X	0	X	X	0	X	0	X
991	moderate	174260588.4	X	0	0	0	0	0	X	0	X	0	X	X	X	X	0	0	0	0	0	0	X	0	X	X	0	0	0	0	0	0	0	X	0	0	X	X	X	X	X	X	X	X	X	0	X	X	0
983	moderate	72851074.46	X	0	X	0	0	0	X	0	X	0	X	X	X	X	X	0	0	0	X	X	X	0	0	0	X	X	0	0	0	0	0	X	X	0	X	X	X	X	X	X	0	X	0	0	X	X	X
973	poor	116220074.3	X	0	X	0	0	0	X	0	X	0	X	X	X	X	X	0	0	0	X	0	X	0	0	0	0	X	0	0	X	0	0	X	0	0	X	X	X	X	X	X	X	X	X	0	0	X	X
954.5	moderate	168494780	X	0	X	0	0	0	X	0	0	0	X	X	0	X	0	0	0	0	X	0	X	0	X	0	0	X	0	0	0	0	0	X	0	0	X	X	X	X	X	X	X	X	X	0	X	0	X
935	moderate	184262549	X	0	X	X	0	0	X	0	0	0	X	X	X	X	X	0	0	0	X	X	X	0	0	0	0	0	0	0	0	0	0	0	X	0	X	X	X	X	X	0	X	X	X	0	0	X	X
917.5	moderate	209911839.7	X	0	X	X	0	0	X	0	X	0	X	X	X	X	X	0	0	0	0	X	X	0	0	0	0	0	0	0	0	0	0	X	0	X	X	X	X	X	X	X	X	X	0	0	0	X	X
901	good	184855314.8	X	0	0	X	0	0	X	0	X	X	X	X	X	X	X	0	0	0	0	0	X	0	X	0	0	0	0	0	0	0	0	X	X	0	X	X	X	X	X	X	0	X	X	0	X	X	X
877.5	moderate	194887907.6	X	0	X	0	0	0	X	0	X	0	X	X	X	X	X	0	0	0	0	X	X	0	X	0	0	0	0	0	0	0	0	X	X	0	X	X	X	X	X	X	X	X	X	0	0	X	X
857.5	moderate	85334453.08	X	0	0	0	0	0	X	0	X	0	0	X	0	X	X	0	0	0	0	0	X	0	0	0	0	0	0	0	0	0	0	X	X	0	X	X	X	X	X	X	0	X	X	0	0	0	X
833.7	moderate	194599184.8	X	0	X	X	0	0	X	0	0	0	0	X	X	X	X	0	0	0	0	X	X	0	0	0	0	0	0	0	0	0	0	X	X	X	X	X	X	X	X	X	X	X	X	0	0	X	0
806.7	good	298755665.6	X	0	X	X	0	0	X	0	X	0	X	X	X	X	X	0	0	0	X	X	X	0	X	0	0	X	0	0	0	0	0	X	X	X	X	X	X	X	X	X	X	X	X	0	X	X	0
795.7	poor	218462197.5	X	0	0	0	0	0	X	0	X	0	0	X	X	X	X	0	0	0	0	0	X	0	0	0	0	0	0	0	0	0	0	X	X	X	X	X	X	X	X	X	X	X	X	X	X	0	0
786	poor	196670231.6	X	0	0	0	0	0	X	0	X	0	X	0	0	X	X	0	0	0	X	0	X	0	0	0	0	0	0	0	X	0	0	X	X	0	X	X	X	X	X	X	X	X	X	0	X	X	0
771	poor	164404198.8	X	0	0	0	0	0	X	0	X	0	X	X	X	X	X	0	0	X	X	X	X	0	0	0	0	0	0	0	X	0	0	X	X	0	X	X	X	X	X	X	X	X	X	X	X	X	0
761.2	moderate	265175042.4	X	0	0	X	0	0	X	0	X	0	X	X	0	X	X	0	0	0	X	X	X	X	X	0	0	0	0	0	X	0	0	X	X	X	X	X	X	X	X	X	X	X	X	X	X	0	0
753.7	moderate	137299771.2	X	0	0	X	0	0	X	0	X	0	0	X	X	X	X	0	0	0	0	X	X	0	X	0	0	0	0	0	X	0	0	X	X	0	X	X	X	X	X	X	0	X	X	0	X	0	0
739.7	poor	191734381.6	X	0	0	0	0	0	X	0	0	0	X	X	X	X	X	0	0	0	X	0	X	0	0	0	0	X	0	0	0	0	0	0	0	0	X	X	X	X	X	X	X	X	X	X	0	0	0
718.5	poor	215274788.4	X	0	0	X	0	0	X	0	X	0	X	X	X	X	X	0	0	0	X	X	X	0	X	0	0	0	0	0	X	0	0	X	X	0	X	X	X	X	X	X	X	X	X	X	X	0	0
706.8	poor	119957459.9	X	0	0	0	0	0	X	0	0	X	X	X	X	X	X	0	0	0	X	X	X	0	0	0	0	0	0	0	X	X	0	0	X	X	X	X	X	X	X	X	X	X	X	X	0	0	0
703.5	poor	107232441.5	X	0	0	0	0	0	X	0	X	X	X	X	X	X	0	0	0	0	0	0	X	0	0	0	0	0	0	0	0	0	0	0	0	0	X	X	X	X	X	X	X	X	X	0	0	0	0
691.9	good	268492850.9	X	0	X	0	0	0	X	0	0	0	X	X	X	X	X	0	0	0	X	X	X	0	0	0	0	0	0	0	X	0	0	X	X	0	X	X	X	X	X	X	X	X	X	0	X	0	0
683	moderate	271548484.1	X	0	0	X	0	0	X	0	X	X	X	X	X	X	X	0	0	X	X	X	X	0	X	0	X	0	X	0	X	0	0	X	X	0	X	X	X	X	X	X	0	X	X	X	X	0	0
674.5	good	213907469.3	X	0	0	0	0	0	X	0	X	X	X	X	X	X	X	0	0	X	X	X	X	0	X	0	0	X	0	0	X	0	0	X	X	0	X	X	X	X	X	X	0	X	X	0	X	0	0
668	moderate	211414528.4	X	0	0	0	0	0	X	0	0	0	X	X	X	X	0	0	0	0	0	X	X	0	0	0	0	0	X	0	X	0	0	0	X	0	X	X	X	X	X	X	0	X	X	0	0	0	0
659.7	good	208348634	X	0	X	0	X	0	X	0	X	X	0	X	0	X	X	0	0	0	0	0	X	0	X	0	X	0	0	0	X	0	0	X	X	0	X	X	X	X	X	X	X	X	X	X	0	0	0
655.3	good	199106260.6	X	0	X	0	0	0	X	0	0	0	X	X	X	X	0	0	0	0	0	X	X	0	0	X	X	0	X	0	X	0	0	0	X	0	X	X	X	X	X	X	X	X	X	0	X	0	0
644.5	good	190959084.3	X	0	0	0	0	0	X	0	0	X	X	X	X	X	0	0	X	0	X	X	X	0	X	0	0	0	0	0	X	X	0	X	X	0	X	X	X	X	X	X	0	X	X	0	0	0	0
638.6	good	52403922.03	X	0	0	0	0	0	X	0	0	X	0	X	0	X	X	0	0	0	0	0	0	0	0	0	0	0	0	0	0	0	0	0	0	0	X	X	X	0	0	0	0	X	X	0	0	X	0
623.9	poor	43750795.47	X	0	0	0	0	X	X	0	X	0	X	X	X	X	X	0	0	0	0	0	X	0	0	0	0	0	0	0	0	0	0	0	0	0	X	X	X	X	X	X	X	X	0	0	0	X	0
607.4	good	87100956.08	X	0	0	0	0	0	X	0	X	0	X	X	X	X	X	X	0	0	0	X	X	0	0	0	X	0	0	0	0	0	0	0	0	0	X	X	X	0	X	0	0	X	X	0	0	X	0
591	moderate	33582408.67	X	0	0	0	0	X	0	0	X	0	X	X	0	X	X	0	0	0	0	0	0	0	0	0	0	0	0	0	0	0	0	0	0	0	X	X	0	X	X	0	0	X	X	0	0	0	0
559.5	poor	54982082.9	X	0	0	0	0	0	X	0	X	0	X	X	X	X	X	0	0	0	0	0	X	0	0	0	0	0	0	0	X	0	0	X	0	0	X	0	X	X	X	X	0	X	0	0	0	0	0
553.3	moderate	103184499.9	X	0	0	0	0	0	X	0	X	X	0	X	0	X	X	0	0	0	0	0	X	0	0	0	0	0	0	0	X	0	0	0	0	X	X	0	0	X	X	0	0	0	X	0	0	X	0
547.3	moderate	37885291.79	X	0	0	0	0	0	X	0	0	0	0	X	0	X	X	0	0	0	0	0	X	0	0	0	0	0	0	0	0	0	0	0	0	0	X	0	0	X	X	X	0	0	X	0	0	0	0
540.9	moderate	77564574.64	X	0	0	0	0	0	X	0	X	0	0	X	X	X	X	0	0	0	0	X	X	0	0	0	X	0	0	0	0	0	0	0	0	0	X	X	0	X	0	0	0	X	0	0	0	0	0
527.5	moderate	27813402.29	X	0	0	0	0	0	X	0	X	0	X	X	0	X	X	0	0	0	X	X	X	0	0	0	X	X	0	0	0	0	0	0	0	0	X	X	0	X	X	X	X	X	X	0	0	X	X
518.3	moderate	124933368.9	X	0	0	0	0	0	X	0	0	X	X	X	0	X	0	0	0	0	0	0	X	0	0	0	0	0	0	0	0	0	0	X	0	0	X	0	X	X	X	X	X	X	X	0	0	0	0
499.2	poor	26230301.6	X	0	0	X	0	0	X	0	0	0	X	X	0	X	X	0	0	0	0	X	0	0	0	0	0	0	0	0	0	0	0	0	0	0	X	X	0	X	X	X	0	X	X	0	0	X	0
494	moderate	26201307.58	X	0	0	0	0	0	X	0	0	X	X	X	X	X	0	0	0	0	0	X	0	0	0	0	0	0	0	0	0	0	0	0	0	0	X	X	X	X	X	X	0	X	X	0	0	X	0
465.7	moderate	10800980.63	X	0	X	0	0	0	X	0	0	0	0	X	X	X	X	0	X	0	0	X	X	0	X	0	X	X	0	0	X	0	0	0	0	0	X	X	X	X	X	X	0	X	X	0	X	X	0
450.9	moderate	26434127.37	X	0	0	0	0	0	X	0	X	X	0	X	X	X	X	0	0	0	0	0	X	0	0	0	X	0	0	0	0	0	0	0	0	0	X	X	X	X	X	X	X	X	0	0	X	0	0
439.4	good	91336754.64	X	0	0	0	0	0	X	0	X	0	0	X	X	X	X	0	0	0	X	0	X	0	X	0	0	0	0	0	0	0	0	0	0	0	X	X	X	X	X	X	X	X	X	0	X	X	X
430.7	moderate	29916655.72	X	0	0	0	0	X	X	0	0	0	0	X	0	X	0	0	0	0	0	0	X	0	0	0	0	0	0	0	0	0	0	X	0	0	X	X	X	X	X	X	0	X	0	0	X	X	0
420.9	moderate	21248602.83	X	0	0	0	0	0	0	0	0	0	0	0	0	X	0	0	0	0	0	0	X	0	0	0	0	0	0	0	0	0	0	0	0	0	X	X	X	X	X	X	0	X	X	0	0	0	0
401.3	moderate	10914748.13	X	0	0	0	0	0	0	0	0	0	0	0	0	0	0	0	0	0	0	0	0	0	0	0	0	0	0	0	0	0	0	0	0	0	X	X	X	0	X	X	0	X	0	0	0	0	0
394.6	moderate	9962321.16	X	0	0	0	0	0	0	0	0	0	0	0	0	0	0	0	0	0	0	0	0	0	0	0	0	0	0	0	0	0	0	0	X	0	0	0	0	0	0	0	0	0	X	0	0	0	0
366.7	good	19905472.89	X	0	0	0	0	0	X	0	0	0	0	0	0	X	0	0	0	0	0	0	X	0	0	0	0	0	0	0	0	0	0	X	X	X	X	X	X	X	X	X	0	X	X	X	0	0	0
353.6	poor	6841945.06	X	0	X	0	0	0	X	0	X	0	0	X	X	X	0	0	0	0	X	0	X	X	0	0	X	0	0	X	0	0	0	X	0	X	0	0	0	0	0	0	0	0	X	X	X	0	0
339.2	moderate	33816185.35	X	0	0	0	0	0	X	0	X	X	0	X	X	X	X	0	0	0	X	X	X	0	0	0	0	0	X	0	0	0	0	0	0	0	X	0	X	X	X	0	0	X	X	X	X	0	0
333.7	moderate	95680834.32	X	0	X	X	0	0	X	X	X	0	X	X	X	X	0	0	0	0	X	X	X	X	X	0	0	0	X	0	X	0	0	X	X	0	X	0	X	X	X	0	0	X	X	0	X	0	0
301.8	poor	17778095.19	X	0	X	0	0	0	X	X	X	0	0	X	X	X	0	0	0	0	X	X	X	0	X	0	X	0	0	0	0	0	0	X	0	X	X	X	X	X	X	X	0	0	X	X	0	X	0
287	poor	9009099.31	X	0	0	0	0	0	X	0	0	0	0	X	0	X	0	0	0	0	0	X	X	0	X	0	0	0	0	0	0	0	0	0	0	0	X	X	X	X	X	X	X	X	X	X	0	0	0
274	moderate	52668143.49	X	0	0	0	0	0	X	0	0	0	0	X	X	X	X	0	0	0	X	X	X	X	X	0	0	X	0	0	X	X	X	X	X	0	X	X	X	X	X	X	0	0	X	X	X	0	0
252	poor	8803808.88	X	0	0	0	0	0	X	0	0	0	0	X	X	X	X	0	0	0	X	X	X	0	0	0	X	X	X	0	0	0	0	0	X	0	X	X	X	X	X	X	X	X	X	0	0	X	0
227.1	moderate	23913376.19	X	0	0	0	0	X	X	0	X	X	0	X	X	X	X	0	0	X	0	X	0	0	0	0	0	0	0	0	X	0	0	X	0	0	X	0	X	X	X	X	0	0	0	0	0	0	0
209.4	moderate	14230656.75	X	0	X	0	0	X	X	0	X	X	X	X	X	X	X	0	0	X	X	X	X	X	0	0	X	X	0	0	X	0	0	0	X	0	X	X	X	X	X	X	0	X	X	0	0	0	0
196.4	moderate	36763214.47	X	0	X	0	0	0	X	0	X	0	X	X	X	X	X	0	0	X	X	X	X	X	X	0	X	0	X	0	X	0	X	X	X	0	X	X	X	X	X	X	0	0	X	0	0	0	0
187.3	good	52030890.39	X	0	X	0	0	0	X	X	X	X	X	X	X	X	X	0	0	X	X	X	X	X	X	0	X	X	0	X	0	0	X	X	X	0	X	X	X	X	X	X	X	X	X	0	0	0	0
176.7	moderate	41364885.11	X	0	0	0	0	0	X	0	0	X	0	X	X	X	X	0	0	X	X	X	X	X	X	0	X	X	0	X	X	0	0	X	0	0	X	X	X	X	X	X	0	0	X	0	0	0	0
165.1	moderate	55799595.68	X	0	0	0	0	0	X	0	X	0	X	X	0	X	X	0	0	X	X	X	X	X	X	X	0	0	0	0	X	0	0	X	X	0	X	X	X	X	X	X	0	0	0	0	X	0	0
154	good	100224109.7	X	0	0	0	0	0	X	X	X	X	X	X	0	X	X	0	0	X	X	X	X	X	X	0	X	X	0	0	X	X	0	0	X	0	X	X	X	X	X	X	0	0	0	0	0	0	0
143	good	60381274.87	X	0	X	0	0	0	X	0	0	0	0	X	X	X	X	0	0	X	X	X	X	X	X	0	0	0	0	0	X	0	0	X	X	0	X	X	X	0	X	X	0	0	X	0	0	0	0
133.3	good	48338489.44	X	0	0	0	0	0	X	0	0	0	X	X	0	X	X	0	0	0	X	X	X	X	X	X	X	0	0	0	0	0	0	0	X	0	X	X	X	X	X	X	0	0	0	0	0	0	0
123.1	moderate	45242843.09	X	0	X	0	0	X	X	0	X	X	X	X	X	X	X	0	0	0	X	X	X	X	X	0	0	X	0	0	0	0	0	X	X	0	X	X	X	X	X	X	0	0	X	0	0	0	0
110.4	moderate	74545781.32	X	0	0	0	0	0	X	0	X	0	X	X	X	X	X	0	0	X	X	X	X	0	X	0	X	0	0	0	0	X	0	X	X	0	X	X	X	X	X	X	0	0	0	0	0	0	0
99.1	moderate	64884960.72	X	0	0	X	0	0	X	X	0	0	0	X	0	X	X	0	0	X	0	X	X	X	X	0	0	X	X	0	0	X	X	X	X	0	X	X	X	X	X	X	0	0	0	0	0	0	0
88.2	moderate	73165429.13	X	0	X	X	0	X	X	X	X	0	0	X	X	X	X	0	0	X	X	X	X	0	X	0	X	0	0	0	X	0	X	X	X	0	X	0	X	X	X	X	0	0	0	0	0	0	0
78.4	moderate	12771745.98	X	0	X	X	0	0	X	0	X	X	X	X	X	X	X	0	0	X	0	X	X	X	X	0	0	0	0	0	0	0	X	X	X	0	X	X	X	X	X	X	0	0	0	0	0	0	0
65.7	moderate	12535840.17	X	0	0	X	0	0	X	0	X	0	X	X	X	X	X	0	0	0	X	X	X	0	X	0	0	0	0	0	0	X	0	X	X	X	X	X	0	X	X	X	0	0	0	0	0	0	0
62.2	moderate	52617447.34	X	0	X	0	0	0	X	0	0	X	X	X	X	X	X	0	0	0	X	X	X	X	X	0	0	X	0	0	0	0	0	X	X	0	X	X	X	X	X	X	X	0	0	0	0	0	0
52.7	moderate	47956716.37	X	0	X	0	0	0	X	X	0	X	X	X	X	X	X	0	0	0	X	X	X	0	X	0	X	0	0	0	X	X	X	X	X	X	X	X	X	X	X	X	X	0	0	0	0	0	0
42.7	moderate	40151039.29	X	0	0	0	0	0	X	0	0	0	X	X	X	X	X	0	0	0	X	X	X	0	0	0	0	0	0	0	0	0	0	X	X	0	X	0	X	X	X	X	0	0	X	0	0	0	0
31.3	moderate	32643986.45	X	0	0	0	0	0	X	0	X	0	X	X	0	X	X	0	0	0	X	X	X	X	X	0	0	0	0	0	X	0	0	X	X	0	X	X	X	X	X	X	0	0	X	0	0	0	0
20.1	moderate	20940203.54	X	X	X	0	0	0	0	0	X	0	X	X	X	X	0	0	0	0	X	X	X	X	0	0	X	0	0	0	X	0	0	X	X	0	X	X	X	X	X	0	0	0	X	0	0	0	0
15.8	moderate	19164862.91	X	0	0	0	0	0	X	0	X	X	X	X	X	X	0	0	0	0	X	X	X	0	0	0	0	X	0	0	0	0	0	0	X	0	X	X	X	X	X	X	0	0	X	0	0	0	0
9.5	moderate	11975837.48	X	0	X	0	0	X	X	X	X	X	0	X	X	X	0	0	0	0	X	X	X	0	0	0	0	X	0	0	0	0	0	X	0	0	X	X	X	X	X	0	0	0	X	0	0	0	0
			x = presence
			0 = absence
[truncated: 3 more columns]
